# Supplementary material for: Reduction of ER stress via a chemical chaperone prevents disease phenotypes in a mouse model of primary open angle glaucoma
Source: JCI journal article supplement (doi:10.1172/jci58183), 2011-08-08
Supplement: sd1 [file 1]

301 Moved Permanently

# Moved Permanently

The document has moved here.
